# Supplementary material for: Tinospora sinensis (Lour.) Merr alkaloid rich extract induces colon cancer cell death via ROS mediated, mTOR dependent apoptosis pathway: “an in-vitro study”
Source: Springer Nature journal article supplement (doi:10.1186/s12906-023-03849-5), 2023-02-03
Supplement: MOESM1 [file 23989600]

Western blots

Caspase 7

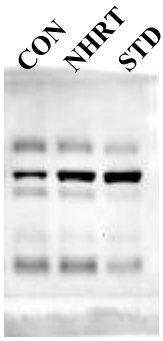

mTOR

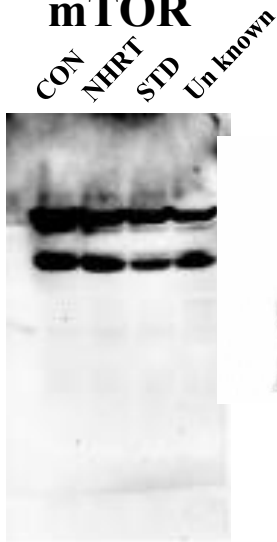

PI3K

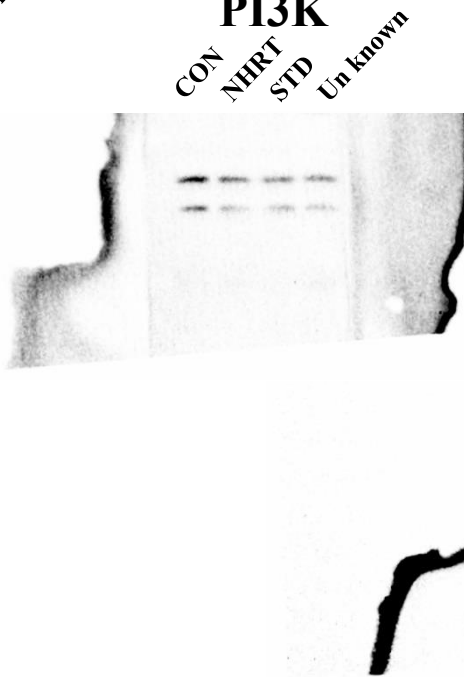

Bcl-2

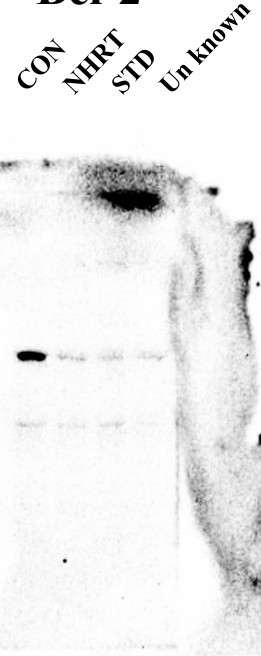

Total Akt

CON NHRT STD Un known

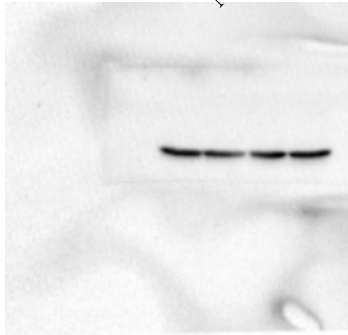

p-Akt

CON NHRT STD Un known

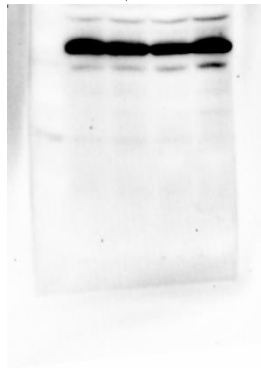

Caspase-9

CON NHRT STD

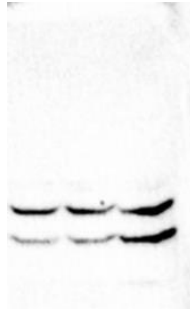

ERK

CON NHRT STD Un known

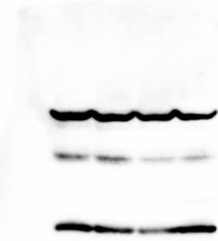

$\beta$ -Actin

CON NHRT STD Un known

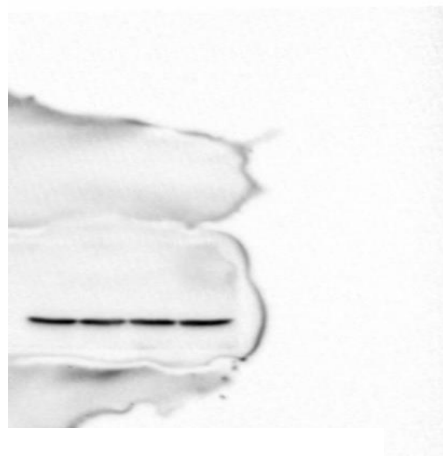

p-ERK

Un known CON NHRT STD

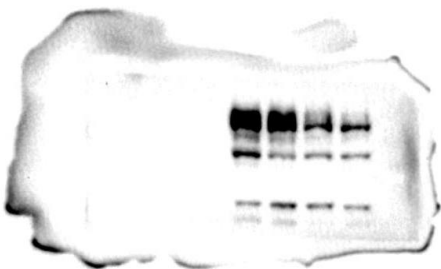

Figure S1: Western blots
